# Supplementary material for: A Gold Nanocage Probe Targeting Survivin for the Diagnosis of Pancreatic Cancer
Source: MDPI journal article supplement (doi:10.3390/pharmaceutics15051547), 2023-05-19
Supplement: s1 [file s1]

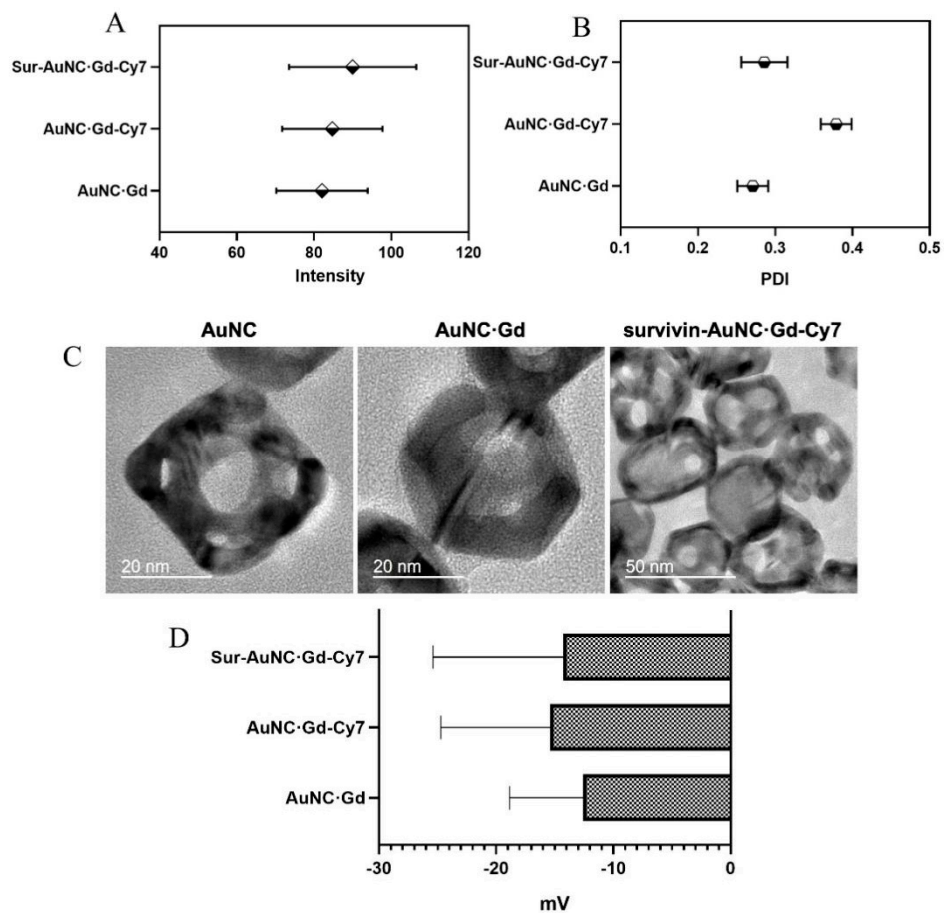

**Figure S1.** Hydrodynamic size of AuNC-Gd, AuNC-Gd-Cy7 nanoparticles and Sur-AuNC-Gd-Cy7 nanoprobe at Intensity(A) and relative PDI (B). The TEM image (C) of AuNC-Gd, AuNC-Gd-Cy7 nanoparticles and Sur-AuNC-Gd-Cy7 nanoprobe and relative zeta potential (D).

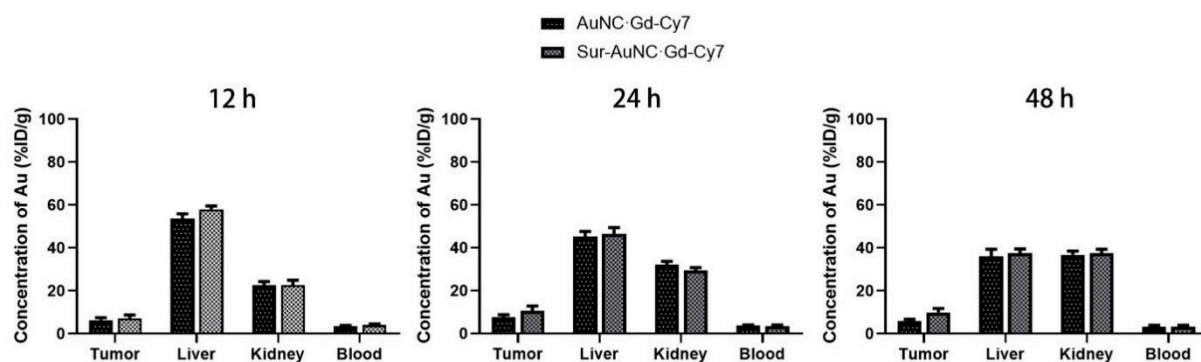

**Figure S2.** The Au concentrations of AuNC-Gd-Cy7 nanoparticles and Sur-AuNC-Gd-Cy7 nanoprobe in tumors and organs at different time points after iv via tail vein.

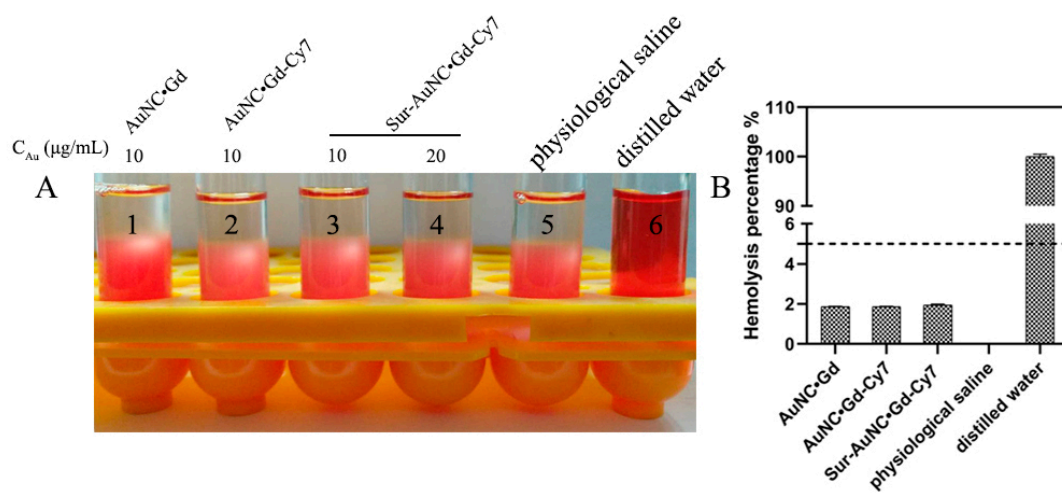

**Figure S3.** The haemolysis experiment (A) and calculated haemolysis (B) of AuNC•Gd, AuNC•Gd-Cy7 nanoparticles and Sur-AuNC•Gd-Cy7 nanoprobe.

### HTERT-HPNE cell

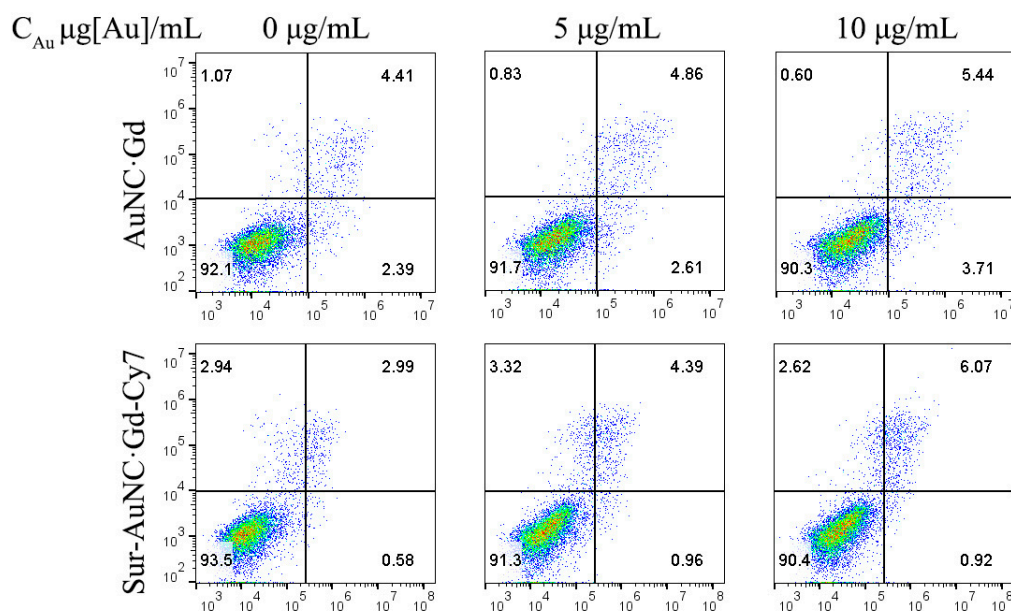

**Figure S4.** Flow cytometric analyses of HTERT-HPNE cells after incubation with AuNC•Gd nanoparticles and Sur-AuNC•Gd-Cy7 nanoprobe for 24h.

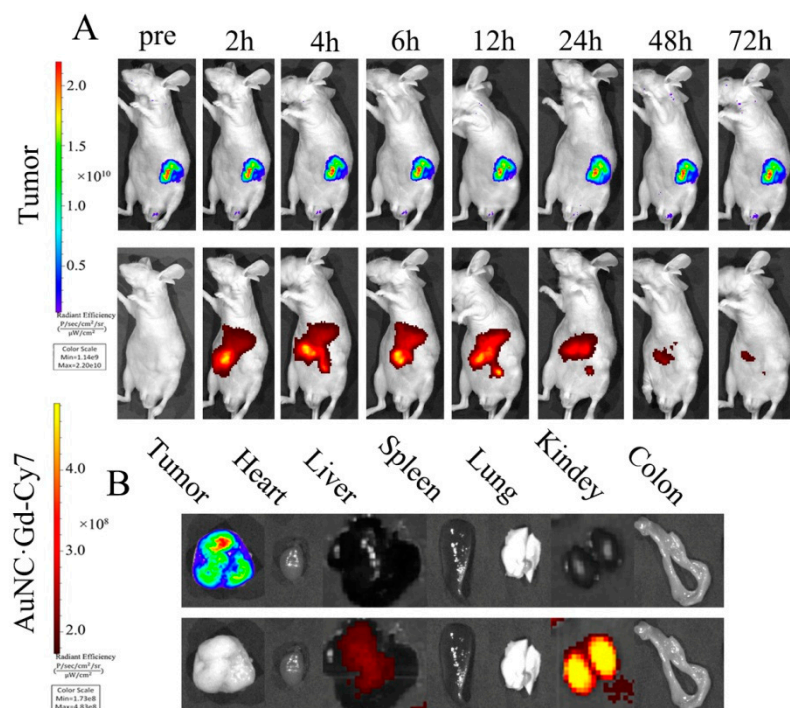

**Figure S5.** (A) Fluorescence images of BxPC-3 xenograft-bearing mice after intravenous (i.v.) injection of AuNC-Gd-Cy7 nanoparticles at different times. (B) Ex vivo images of major organs, such as heart, liver, spleen, lung, kidney, and tumors excised at 72h post-injection.
